# Supplementary material for: S1PR1 inhibition induces proapoptotic signaling in T cells and limits humoral responses within lymph nodes
Source: JCI journal article supplement (doi:10.1172/jci174984), 2024-01-09
Supplement: sd1 [file 1]

301 Moved Permanently

# Moved Permanently

The document has moved here.
