# Supplementary material for: S1PR1 inhibition induces proapoptotic signaling in T cells and limits humoral responses within lymph nodes
Source: JCI journal article supplement (doi:10.1172/jci174984), 2024-01-09
Supplement: sd1 [file 1]

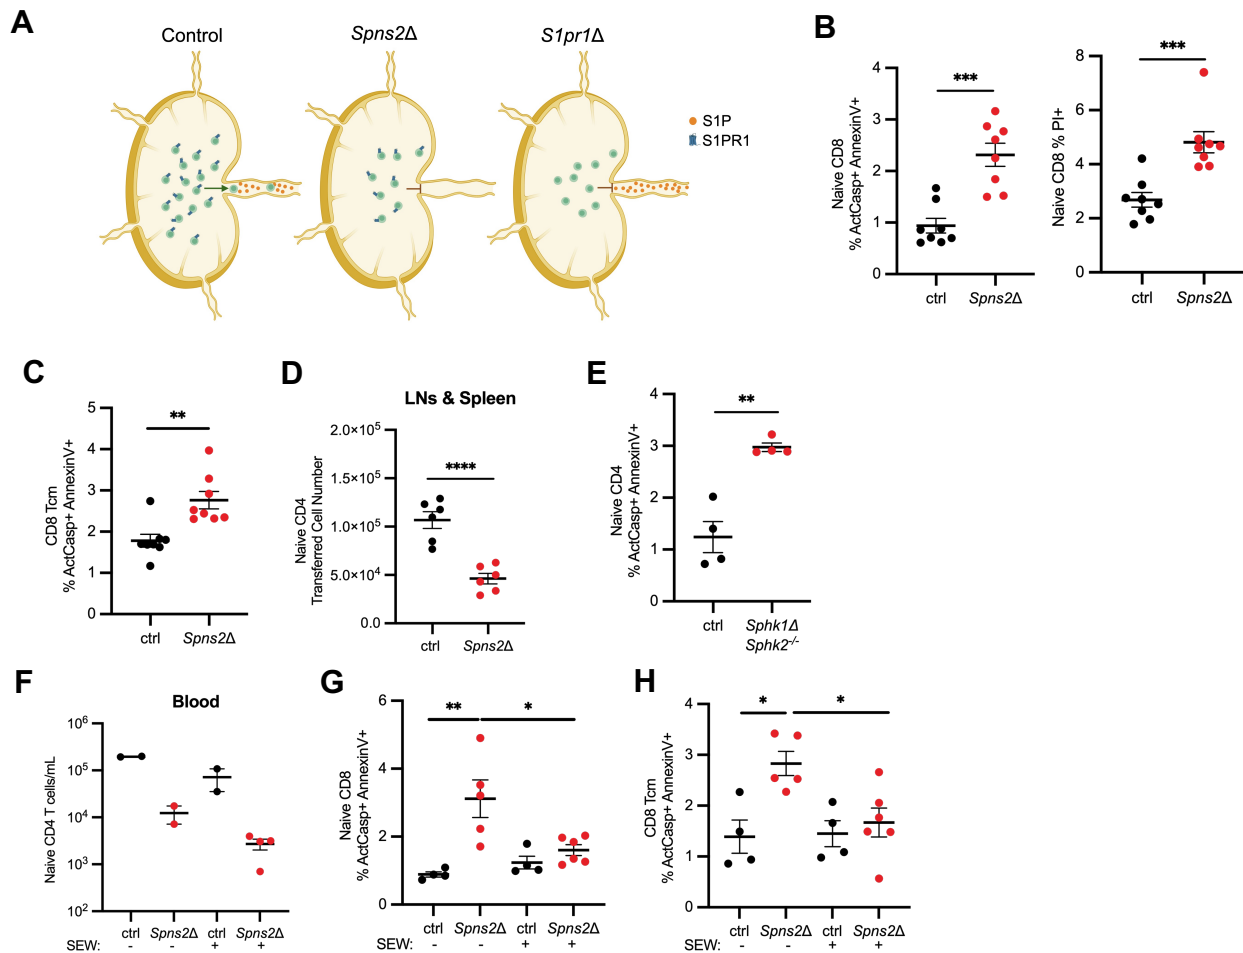

**Supplementary Figure 1: SPNS2-derived S1P and S1PR1 prevent apoptotic death of naive T cells.**

A) Schematic of naive T cell trafficking. Left: In a normal mouse, S1P is high in lymph compared to LN, and T cells express S1PR1. S1PR1 guides T cells out of the low-S1P environment of LN into the high-S1P environment of lymph. Center: In a SPNS2-deficient mouse, lymph S1P is lost. T cells still express S1PR1, but without lymph S1P to attract T cells out of the LN, T cells do not exit. Right: In an S1PR1-deficient mouse, S1P remains high in lymph compared to LN. However, without S1PR1, T cells cannot sense the S1P gradient and do not exit. Created with biorender.com.

B-C) *Spns2<sup>fl/fl</sup> UBC-CreERT2* mice and littermate controls were treated with tamoxifen, and 3-4 weeks later LN T cells were analyzed by flow cytometry. (B) Frequency of ActCasp+ AnnexinV+ and PI+ cells among naive CD8+ T cells. (C) Frequency of ActCasp+ AnnexinV+ among CD8+ Tcm (CD62L+CD44hi). Compilation of 4 experiments with n=8 mice for both groups.

D) *Spns2<sup>fl/fl</sup> UBC-CreERT2* mice and littermate controls were treated with tamoxifen. 3-4 weeks after tamoxifen treatment, the mice received  $1 \times 10^6$  CD45.1+ lymphocytes intravenously. Three weeks post-transfer, naive CD4+ CD45.1+ T cells remaining in the recipient animals were enumerated (total reflects sum of cells in skin-draining LN, mesenteric LN, and spleen). Compilation of 3 experiments with n=6 mice per group.

E) Frequency of ActCasp+ AnnexinV+ cells among naive CD4+ T cells in LN of *Sphk1<sup>fl/fl</sup> Sphk2<sup>-/-</sup> Lyve1-Cre* mice and littermate controls. Compilation of 2 experiments with n=4 mice for both groups.

F-H) *Spns2<sup>fl/fl</sup> Lyve1-Cre* mice and littermate controls were treated with 10mg/kg SEW-2871 or vehicle daily. After ten days of treatment, T cells were analyzed by flow cytometry. (E) Number of naive CD4+ T cells in the blood of *Spns2Δ* mice and littermate controls, with and without SEW-2871 treatment. Frequency of ActCasp+ AnnexinV+ cells among (G) naive CD8+ T cells and (H) CD8+ Tcm (CD62L+CD44hi) in LN of *Spns2Δ* mice and littermate controls, with and without SEW-2871 treatment. Compilation of 3 experiments with n=3-4 mice per group.

Statistical analysis: Student's t test was performed for panels B-E. One-way ANOVA was performed for panel G-H. \*p ≤ 0.05, \*\*p ≤ 0.01, \*\*\*p ≤ 0.001, \*\*\*\*p ≤ 0.0001, N.S. non-significant.

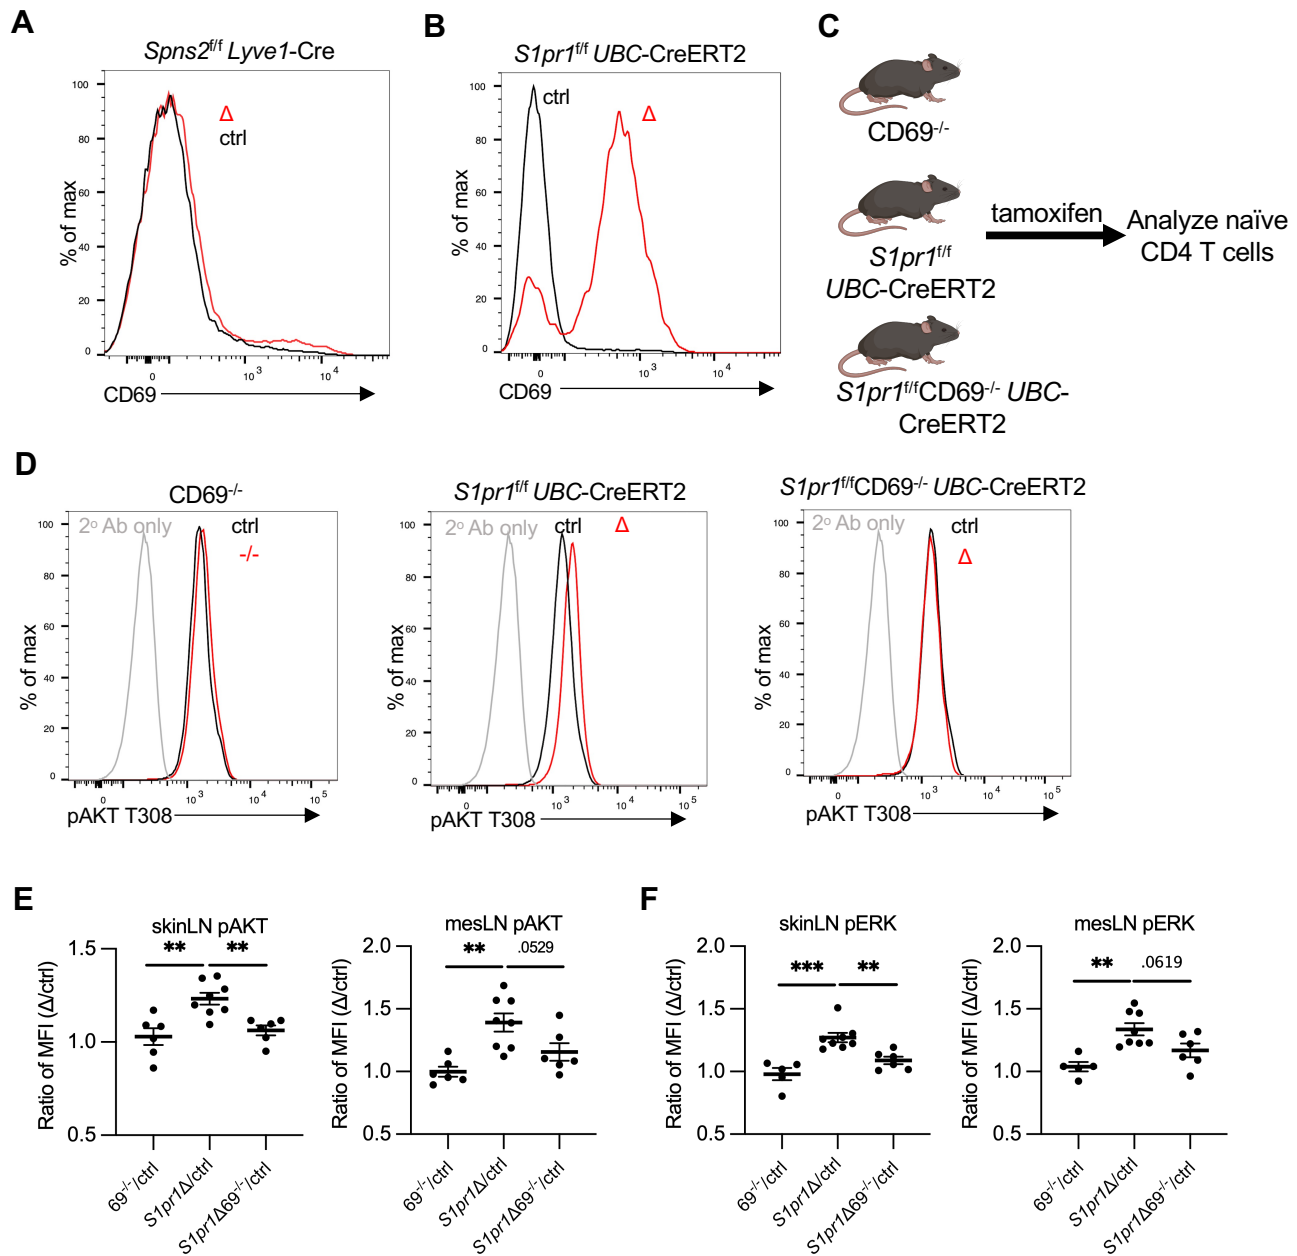

### Supplementary Figure 2: CD69 regulates increased pAKT and pERK in S1PR1-deficient naive T cells.

**Text:** One distinction between naive T cells from *Spns2Δ* and *S1pr1Δ* mice is that naive *S1pr1Δ* T cells have high surface levels of the C-type lectin CD69 compared to controls, while naive T cells from *Spns2Δ* mice do not have detectable surface CD69 (Figures S2A-S2B). CD69 and S1PR1 play antagonistic roles on the cell surface (71). Naive T cells express high levels of S1PR1, which binds basal CD69 and maintains its low surface expression. A recently activated T cell robustly increases *Cd69* transcription, which shifts the balance; the increased CD69 binds S1PR1 and forces its internalization, keeping T cells at the site of activation. Naive *S1pr1Δ* T cells have high levels of surface CD69 at baseline. Much remains to be learned about CD69's function, but we hypothesized that surface CD69 might promote AKT and ERK signaling, as these pathways are normally induced early during T cell activation. To test this, we crossed *S1pr1<sup>fl/fl</sup>UBC-CreERT2* with *Cd69<sup>-/-</sup>* mice (64) and asked whether loss of CD69 reduced AKT and ERK phosphorylation in *S1pr1Δ* T cells (Figure S2C). *S1pr1Δ* naive T cells had increased expression of pAKT and pERK compared to littermate controls and *Cd69<sup>-/-</sup>* T cells, but *S1pr1Δ; Cd69<sup>-/-</sup>* naive T cells had similar expression of pAKT and pERK to controls and *Cd69<sup>-/-</sup>* T cells (Figures S2D-S2F). This suggests that high expression of CD69 in *S1pr1Δ* naive T cells partially explains the increased pAKT and pERK.

**Legend:** A-B) Representative histogram of CD69 surface expression on naive CD4+ T cells from LN of (A) *Spns2Δ* and (B) *S1pr1Δ* (red) or littermate control (black) mice.

C-F) *S1pr1<sup>fl/fl</sup>UBC-CreERT2* mice, *CD69<sup>-/-</sup>* mice, or *S1pr1<sup>fl/fl</sup>UBC-CreERT2; CD69<sup>-/-</sup>* mice and their respective littermate controls were treated with tamoxifen. 3-4 weeks later, T cells from either skin-draining LN or mesenteric LN were analyzed by flow cytometry for pAKT and pERK expression. (C) Experiment diagram. (D) Representative histograms of pAKT expression by naive CD4 T cells from skin-draining LN of the indicated mice. (E-F) Compilation. Each point represents ratio of (E) pAKT or (F) pERK geometric MFI in naive CD4+ T cells between a *S1pr1Δ*, *CD69<sup>-/-</sup>*, or *S1pr1Δ CD69<sup>-/-</sup>* mouse and its respective littermate control. Compilation of 6 experiments with n=6-8 mice per group.

Statistical analysis was performed using One-way ANOVA with multiple comparisons. \*p ≤ 0.05, \*\*p ≤ 0.01, \*\*\*p ≤ 0.001, \*\*\*\*p ≤ 0.0001, N.S. non-significant.

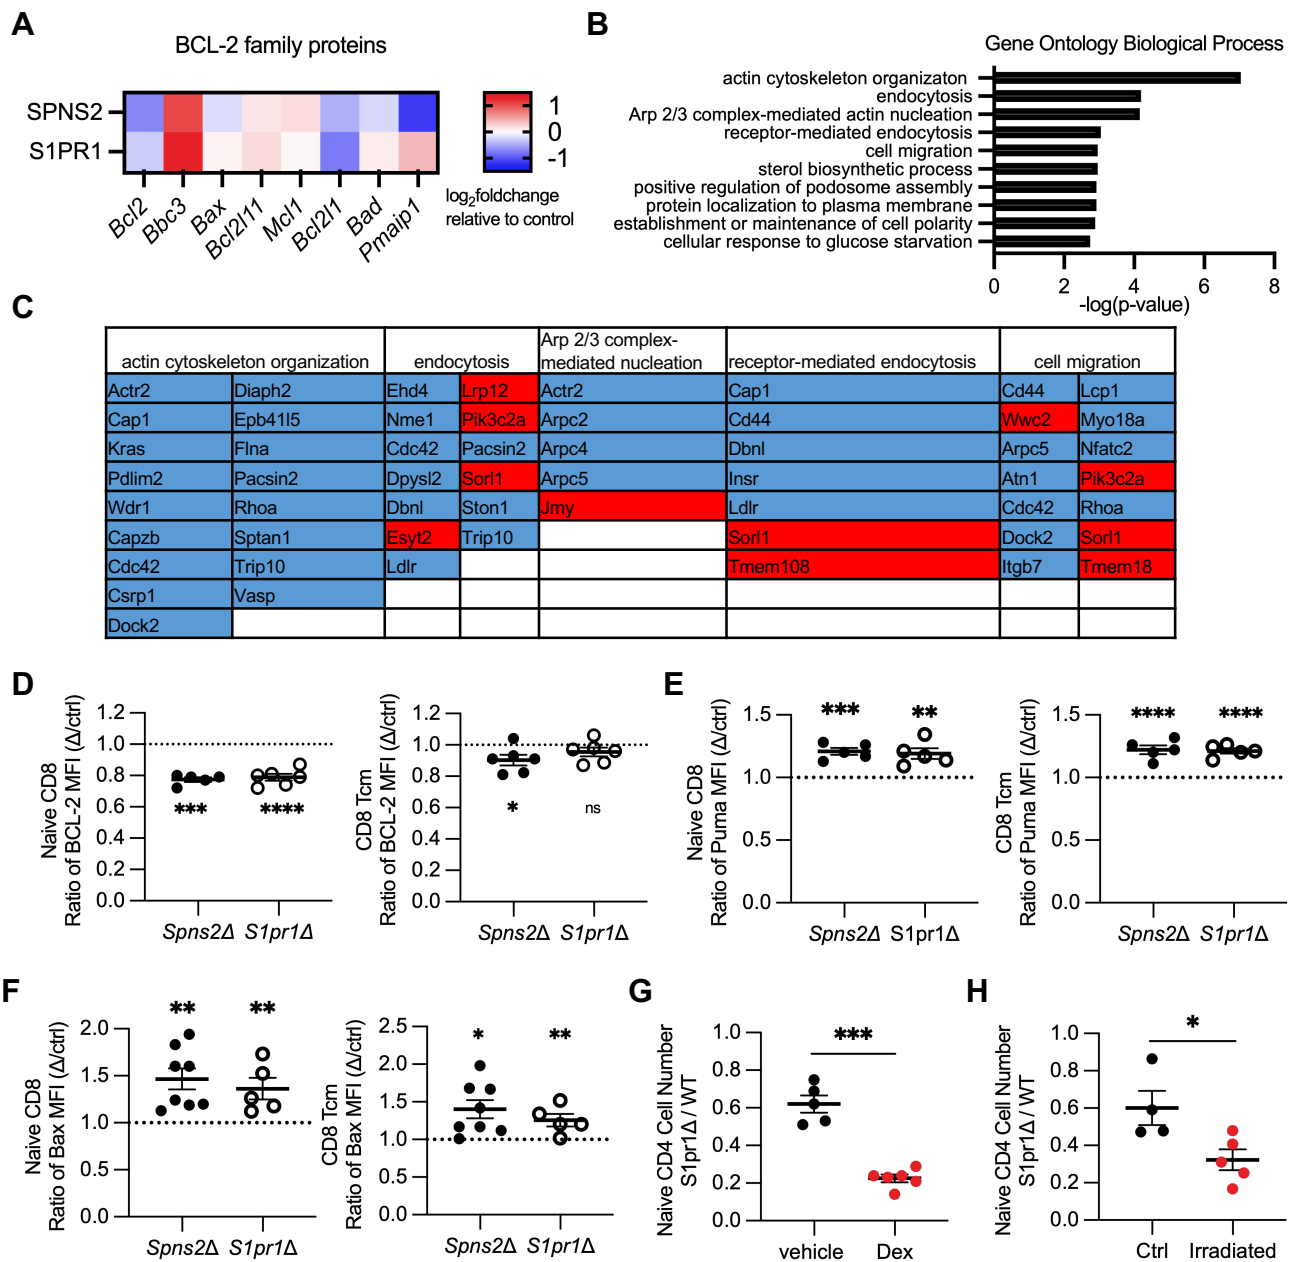

**Supplementary Figure 3: Expression of BCL-2 family proteins in the absence of S1P signaling.**

A-C) For SPNS2: CD45.2 *Spns2<sup>fl</sup> Lyve1-Cre* mice or CD45.2 littermate control mice were lethally irradiated and reconstituted with WT CD45.1/2 bone marrow. After reconstitution, naïve CD4 T cells were isolated and RNA-Seq was performed. For S1PR1: a 50:50 mixture of CD45.2 UBC-GFP: CD45.2 *S1pr1<sup>fl</sup> UBC-CreERT2* or CD45.2 UBC-GFP: CD45.2 *S1pr1<sup>fl</sup>* control bone marrow was transferred into lethally irradiated CD45.1/2 WT mice. After reconstitution, mice were treated with tamoxifen. Four weeks after tamoxifen treatment, naïve T cells were isolated and RNA-Seq was performed. (A) Heatmap of BCL-2 family proteins in naïve CD4 T cells from *Spns2Δ* and *S1pr1Δ* mice. Heatmap represents  $\log_2$  fold change of genes from either *Spns2Δ* mice or *S1pr1Δ* mice relative to control cells. (B) Differentially expressed genes shared between both *Spns2Δ* and *S1pr1Δ* datasets were used to generate top 10 Gene Ontology (GO) biological process using DAVID Bioinformatics Resource. (C) Differentially expressed genes shared between both *Spns2Δ* and *S1pr1Δ* datasets listed under top Gene Ontology Biological Processes. Red: up in the absence of S1P signaling. Blue: down in the absence of S1P signaling.

D-F) Expression of BCL-2 family members in naïve CD8<sup>+</sup> T cells and CD8<sup>+</sup> Tcm (CD62L+CD44<sup>hi</sup>) from LN of *Spns2Δ* or *S1pr1Δ* mice and littermate controls. (D) Compilation of BCL-2 expression. Each point represents the ratio of BCL-2 geometric MFI between a *Spns2Δ* or *S1pr1Δ* mouse and its littermate control. Compilation of 5-6 experiments with n=5-7 pairs per group. (E) As in (D) for PUMA. Compilation of 4-5 experiments with n=4-5 pairs per group. (F) As in (D) for BAX. Compilation of 6 experiments with n=5-8 pairs per group.

G-H) *S1pr1Δ* and littermate control lymphocytes were co-transferred (1:1 by naïve CD4 T cell counts) intravenously into WT recipients. The transferred cells were labeled with CellTrace Violet or CellTrace Yellow, and dyes were swapped between experiments. 24 hours later, recipients were treated with either 2 mg/kg dexamethasone or 1 gy irradiation. 24 hours later, dye-labeled naïve CD4 T cells in LN were enumerated. Compilation of ratio of number of naïve CD4<sup>+</sup> T cells from *S1pr1Δ* mice vs its littermate control recovered in recipients. (G) 2 mg/kg dexamethasone treatment. Compilation of 3 experiments with n=5-7 mice per group. (H) 1 gy irradiation. Compilation of 2 experiments with n=4-5 mice per group.

Statistical analysis was performed using Student's t test. \* $p \leq 0.05$ , \*\* $p \leq 0.01$ , \*\*\* $p \leq 0.001$ , \*\*\*\* $p \leq 0.0001$ , N.S. non-significant.

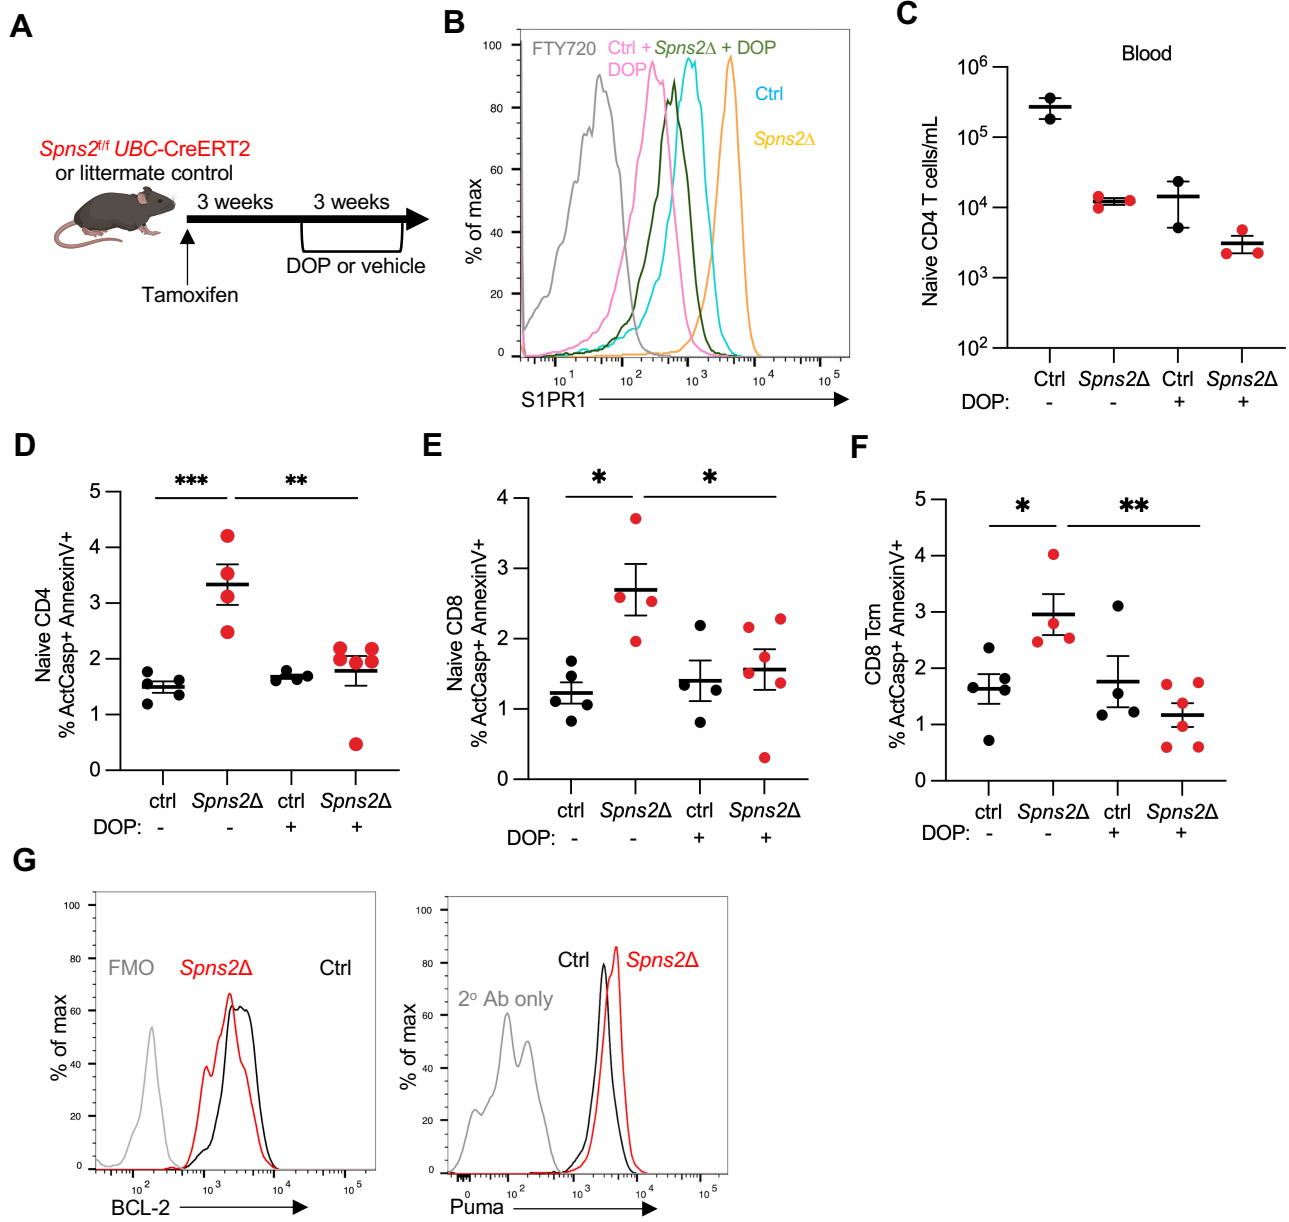

**Supplementary Figure 4: BCL-2 family proteins regulate S1PR1-dependent naïve T cell survival.**

A-F) *Spns2<sup>fl</sup> UBC-CreERT2* mice and littermate controls were treated with tamoxifen. At least 3 weeks later, mice were treated with 30mg/l DOP and 10mg/l sucrose, or sucrose alone, in the drinking water. After 3 weeks of DOP treatment, LN T cells were analyzed by flow cytometry. (A) Experiment design. (B) Representative histogram of surface S1PR1 expression on naïve CD4+ T cells from LN of *Spns2Δ* mice and littermate controls, with and without DOP treatment. (C) Number of naïve CD4+ T cells in the blood of *Spns2Δ* mice and littermate controls, with and without DOP treatment. Compilation of 2 experiments with n=2-3 per group. (D) Frequency of ActCasp+ AnnexinV+ cells among naïve CD4+ T cells in LN of *Spns2Δ* mice or littermate controls, with or without DOP treatment. Compilation of 3 experiments with n=4-6 mice per group. (E) Frequency of ActCasp+ AnnexinV+ cells among naïve CD8+ T cells and (F) CD8+ Tcm (CD62L+CD44hi) in LN of *Spns2Δ* mice or littermate controls, with and without DOP treatment. Compilation of 3 experiments with n=4-6 per group.

G) Representative histograms of BCL-2 and PUMA expression in *Bax<sup>-/-</sup>* naïve CD4+ T cells transferred to *Spns2<sup>fl</sup> Lyve1-Cre* mice or littermate controls.

Statistical analysis was performed using one-way ANOVA with multiple comparisons. \*p ≤ 0.05, \*\*p ≤ 0.01, \*\*\*p ≤ 0.001, \*\*\*\*p ≤ 0.0001, N.S. non-significant.

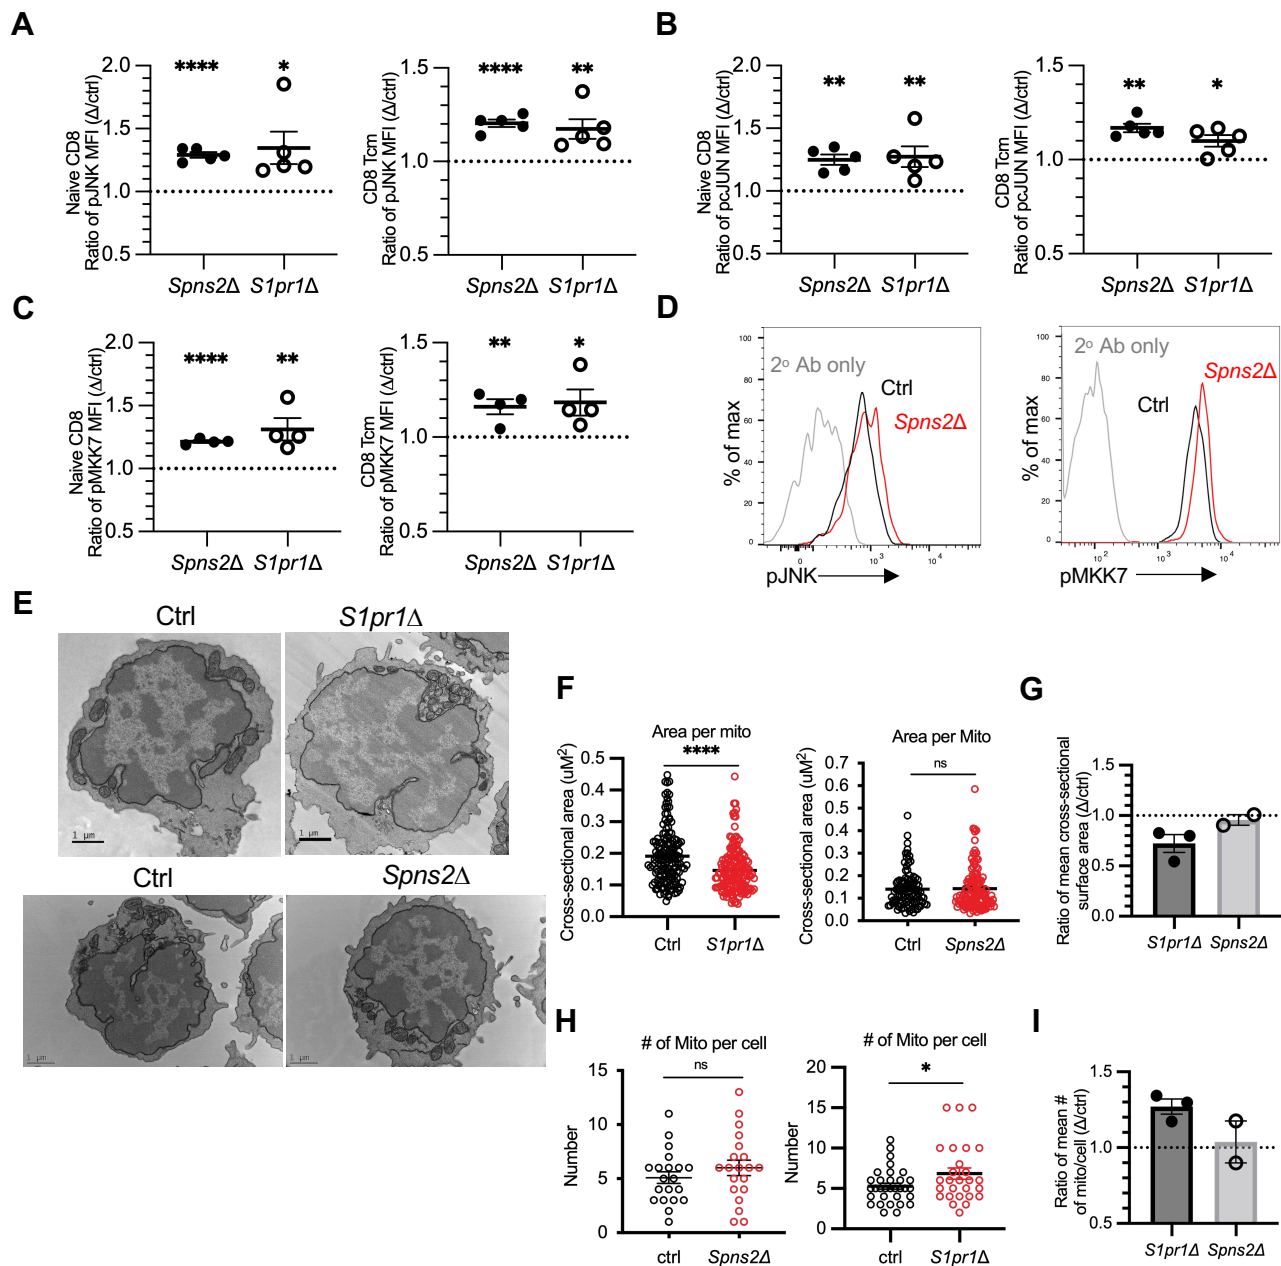

### Supplementary Figure 5: JNK signaling regulates S1P-dependent naïve T cell survival.

A-C) Expression of phosphorylated JNK pathway proteins in naïve CD8<sup>+</sup> T cells and CD8<sup>+</sup> Tcm (CD62L<sup>+</sup>CD44<sup>hi</sup>) from LN of *Spns2 $\Delta$*  or *S1pr1 $\Delta$*  mice and littermate controls, analyzed by flow cytometry. (A) Compilation of relative MFI values for pJNK. Relative values represent expression in one individual mouse divided by the mean value of littermate control mice in that experiment. Compilation of 4-5 experiments with n=5 pairs per group. (B) As in (A) for pcJUN. Compilation of 4-5 experiments with n=4-5 pairs per group. (C) As in (A) for pMKK7. Compilation of 4 experiments with n=4 pairs per group.

D) Representative histograms of pJNK and pMKK7 expression in *Bax<sup>-/-</sup>* naïve CD4<sup>+</sup> T cells transferred to *Spns2<sup>fl/fl</sup>* Lyve1-Cre mice or littermate controls.

E-I) Electron microscopy analysis of mitochondria in naïve CD4<sup>+</sup> T cells sorted from LN. (E) Representative images of mitochondria within naïve CD4<sup>+</sup> T cells from LN of a *S1pr1 $\Delta$*  mouse and its littermate control or a *Spns2 $\Delta$* <sup>Lyve1</sup> mouse and its littermate control. (F) Cross-sectional area of individual mitochondria, from one representative set of mice examining at least 20 cells per genotype. (G) Compilation of the ratio of the mean cross-sectional area of mitochondria in naïve CD4<sup>+</sup> T cells of *S1pr1 $\Delta$*  mice vs their littermate controls (3 pairs in 3 experiments) or of *Spns2 $\Delta$*  mice vs their littermate controls (2 pairs in 2 experiments). (H) Number of mitochondria per cell, from one representative set of mice examining at least 20 cells per genotype. (I) Compilation of the ratio of the mean number of mitochondria per cell of *S1pr1 $\Delta$*  mice vs their littermate controls (3 pairs in 3 experiments), or of *Spns2 $\Delta$*  mice vs their littermate controls (2 pairs in 2 experiments).

Statistical analysis was performed using Student's t test. \*p  $\leq$  0.05, \*\*p  $\leq$  0.01, \*\*\*p  $\leq$  0.001, \*\*\*\*p  $\leq$  0.0001, N.S. non-significant.

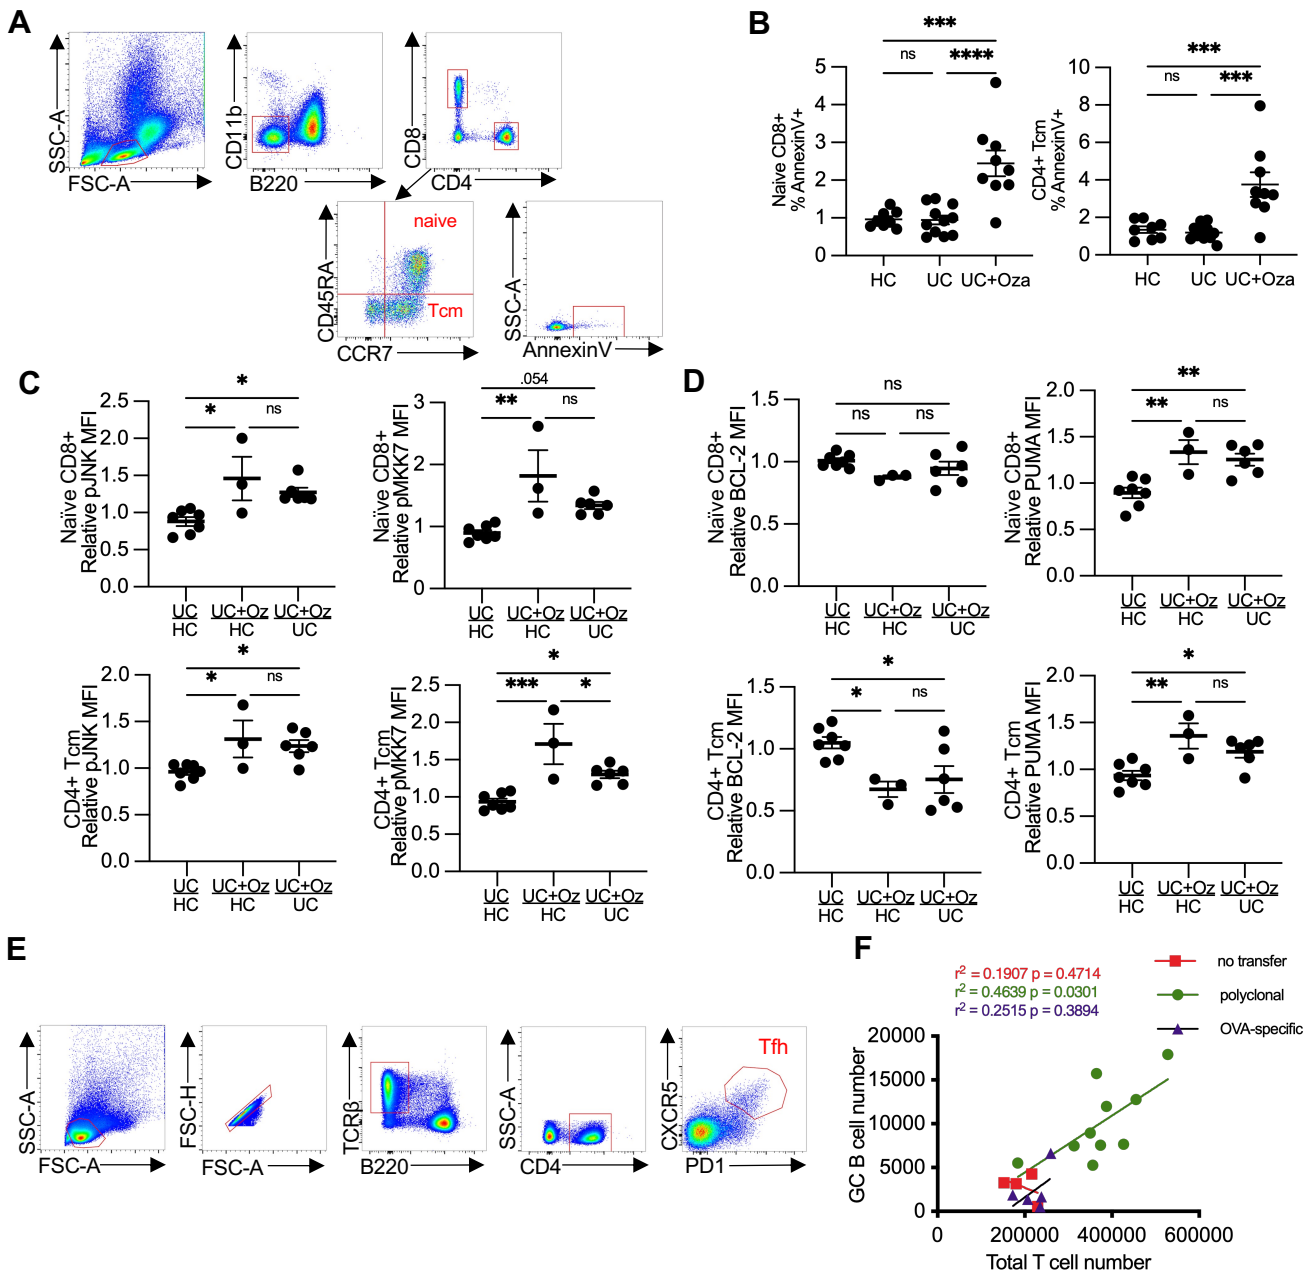

**Supplementary Figure 6: S1PR1 modulators impair T cell survival in humans and germinal center responses in mice.**

A-D) PBMCs were isolated from blood samples of UC patients treated with ozanimod (UC+Oza), UC patients not treated with ozanimod (UC), or healthy controls (HC), and analyzed by flow cytometry. (A) Gating strategy to analyze naïve CD4+, naïve CD8+, and CD4+ Tcm. (B) Frequency of AnnexinV+ cells among naïve CD8+ T cells or among CD4+ Tcm cells. Compilation of 10 experiments with n=8-11 per group. (C) Compilations of pJNK and pMKK7 relative geometric MFI values from naïve CD8+ T cells or from CD4+ Tcm cells, calculated as in Fig. 7F. Compilation of 10 experiments with n=3-7 per group. (D) Compilations of relative MFI values for BCL-2 and PUMA from naïve CD8+ T cells or from CD4+ Tcm cells. Compilation of 10 experiments with n=3-7 per group.

E) Gating strategy to identify Tfh cells.

F) Correlation between total T cell numbers and GC B cell numbers from 'Long FTY + no transfer' group, 'Long FTY + polyclonal T cells' group, and 'Long FTY + OVA-specific T cells' group.

Statistical analysis was performed using one-way ANOVA with multiple comparisons for panels B-D. \*p ≤ 0.05, \*\*p ≤ 0.01, \*\*\*p ≤ 0.001, \*\*\*\*p ≤ 0.0001, N.S. non-significant.

**Supplementary Table 1: Characteristics of ulcerative colitis patients and healthy controls**

|                                           | Healthy Controls (n=8) | UC+ No Ozanimod (n=11) | UC + Ozanimod (n=9) |
|-------------------------------------------|------------------------|------------------------|---------------------|
| Sex                                       |                        |                        |                     |
| Female                                    | 5 (62.5%)              | 2 (18.2%)              | 4 (42.9%)           |
| Male                                      | 3 (37.5%)              | 9 (81.8%)              | 5 (57.1%)           |
| Race                                      |                        |                        |                     |
| White                                     | 6 (75%)                | 6 (54.5%)              | 5 (55.6%)           |
| Black                                     | 0                      | 0                      | 3 (33.3%)           |
| Asian                                     | 0                      | 2 (18.2%)              | 1 (11.1%)           |
| Other/mixed                               | 2 (25%)                | 3 (27.3%)              | 0                   |
| Hispanic ethnicity                        | 0                      | 1 (9.1%)               | 0                   |
| Age at Encounter (years; median, IQR)     | 32 (28)                | 33 (17)                | 29 (7.5)            |
| Age at IBD diagnosis (years; median, IQR) | -                      | 26 (15)                | 24 (7)              |
| Duration of disease (years; median, IQR)  | -                      | 6 (10)                 | 4 (4)               |
| Maximum ulcerative colitis extent         | -                      |                        |                     |
| Proctitis                                 |                        | 1 (9.1%)               | 2 (22.2%)           |
| Left-sided                                |                        | 0                      | 3 (33.3%)           |
| Extensive colitis                         |                        | 9 (81.8%)              | 4 (42.9%)           |
| Inflammatory biomarkers within 30 days    | -                      |                        |                     |
| C-rp (median, IQR)                        |                        | 0.7 (2.7)              | 1.3 (4.6)           |
| Fecal calpro (median, IQR)                |                        | 262 (250)              | 839 (435)           |
| Mayo endoscopic subscore within 30 days   | -                      |                        |                     |
| 0                                         |                        | 4 (36.3%)              | 1                   |
| 1                                         |                        | 2 (18.2%)              | 0                   |
| 2                                         |                        | 2 (18.2%)              | 4 (42.9%)           |
| 3                                         |                        | 1 (9.1%)               | 2 (22.2%)           |
| Not assessed                              |                        | 2 (18.2%)              | 2 (22.2%)           |
| IBD therapy exposure history              | -                      |                        |                     |
| Mesalamines                               |                        | 10 (90.9%)             | 9 (100%)            |
| Corticosteroids                           |                        | 9 (81.8%)              | 8 (88.9%)           |
| Immunomodulators                          |                        | 2 (18.2%)              | 2 (22.2%)           |
| Anti-TNF                                  |                        | 4 (36.3%)              | 2 (22.2%)           |
| Vedolizumab                               |                        | 1 (9.1%)               | 2 (22.2%)           |
| JAK inhibitor                             |                        | 0                      | 2 (22.2%)           |

**Supplementary Table 2: Materials used in the study**

| Reagent or Resource                              | Source                   | Identifier                               |
|--------------------------------------------------|--------------------------|------------------------------------------|
| Antibodies                                       |                          |                                          |
| APC-conjugated Streptavidin                      | BioLegend                | catalog no. 405207                       |
| APC-conjugated anti-mouse CD44 (IM7)             | BioLegend                | catalog no. 103012 RRID:AB_312963        |
| APC-conjugated anti-human CCR7 (G043H7)          | BioLegend                | catalog no. 353213 RRID:AB_10915474      |
| APC-conjugated anti-mouse CD45.2 (104)           | BioLegend                | catalog no. 109814 RRID: AB_389211       |
| APC-Cy7-conjugated anti-human CD11b (MI/70)      | BioLegend                | catalog no. 101226 RRID: AB_830642       |
| APC-e780-conjugated anti-mouse CD8a (5.3-6.7)    | Thermo Fisher Scientific | catalog no. 47-0081-82 RRID: AB_1272185  |
| APC-e780 conjugated anti-TCR-beta (H57-597)      | Thermo Fisher Scientific | catalog no. 47-5961-82 RRID: AB_1272173  |
| Biotinylated Affinipure Fragment Donkey anti-Rat | Jackson ImmunoResearch   | catalog no. 712-066-153 RRID: AB_2340649 |
| BUV395-conjugated anti-mouse CD4 (GK1.5)         | BD Biosciences           | catalog no. 740208 RRID: AB_2734761      |
| BUV395- conjugated anti- B220 (RA3-6B2)          | BD Biosciences           | catalog no.563793 RRID: AB_2738427       |
| BV421-conjugated anti-mouse CD62L (MEL-14)       | BioLegend                | catalog no. 104436 RRID:AB_2562560       |
| BV421-conjugated anti-human CD45RA (HI100)       | BioLegend                | catalog no. 304130 RRID:AB_10965547      |
| BV510-conjugated anti-mouse CD62L (MEL-14)       | BioLegend                | catalog no. 104441 RRID: AB_2561537      |
| BV650-conjugated anti-mouse CD25 (PC61)          | BioLegend                | catalog no. 102038 RRID: AB_2563060      |
| FITC-conjugated anti-mouse CD45.1 (A20)          | BioLegend                | catalog no. 110706 RRID: AB_313495       |
| FITC-conjugated anti-mouse CD62L (MEL-14)        | BioLegend                | catalog no. 104408 RRID: AB_313095       |
| PE-conjugated anti-mouse CD69 (H1.2F3)           | BioLegend                | catalog no. 104508 RRID: AB_313111       |
| PE-conjugated anti-mouse CD44 (IM7)              | BioLegend                | catalog no. 103024 RRID:AB_493687        |
| PE-conjugated anti-mouse CD45.1 (A20)            | BioLegend                | catalog no. 110708 RRID:AB_313496        |



|                                                               |                           |                                          |
|---------------------------------------------------------------|---------------------------|------------------------------------------|
| PE-conjugated anti-mouse CD127 (A7R34)                        | BioLegend                 | catalog no.135010 RRID: AB_1937251       |
| PE-conjugated anti-human CCR7 (G043H7)                        | BioLegend                 | catalog no. 353203 RRID:AB_10916391      |
| PE-conjugated anti-mouse BCL-2 (BCL/10C4)                     | BioLegend                 | catalog no. 633508 RRID: AB_2290367      |
| PE-conjugated anti-human BCL-2 (100)                          | BioLegend                 | catalog no. 658707 RRID:AB_2563282       |
| PerCP-Cy5.5-conjugated anti-mouse B220 (RA3-6B2)              | BioLegend                 | catalog no. 103236 RRID: AB_893354       |
| PerCP-Cy5.5-conjugated anti-mouse CD44 (IM7)                  | BioLegend                 | catalog no. 103032 RRID: AB_2076204      |
| PerCP-Cy5.5-conjugated anti-mouse CD45.2 (104)                | BioLegend                 | catalog no. 109828 RRID:AB_893350        |
| Rat anti-mouse S1PR1 (713412)                                 | R&D Systems               | catalog no. MAB7089                      |
| Rabbit anti-phospho AKT T308 (D25E6)                          | Cell Signaling Technology | catalog no. 13038S                       |
| Rabbit anti-phospho-p44/p42 ERK1/2 Thr 202/Tyr 204            | Cell Signaling Technology | catalog no. 9101L                        |
| Rabbit anti-phospho-S6 Ribosomal protein (Ser235/236)         | Cell Signaling Technology | catalog no. 2211L                        |
| Rabbit polyclonal anti-PUMA                                   | ProSci                    | catalog no. 3043                         |
| Mouse anti-Bax (6A7)                                          | Thermo Fisher Scientific  | catalog no. MA5-14003 RRID: AB_10979735  |
| Rabbit anti-phospho-JNK1/2 (D12H7L17)                         | Thermo Fisher Scientific  | catalog no. 700031 RRID: AB_2532273      |
| Mouse anti-phospho-cJUN (KM-1)                                | Santa Cruz Biotechnology  | catalog no. sc-822                       |
| Rabbit anti-phospho-MKK7 (Ser271,Thr 275) (MKK7S271T275-R4F9) | Thermo Fisher Scientific  | catalog no. MA5-28042                    |
| Rabbit anti-phospho-CREB (87G3)                               | Cell Signaling Technology | catalog no. 9198S                        |
| Alexa Fluor 647-conjugated donkey anti-rabbit IgG             | Jackson ImmunoResearch    | catalog no. 711-605-152 RRID:AB_2492288  |
| Alexa Fluor 647-conjugated donkey anti-mouse IgG              | Jackson ImmunoResearch    | catalog no. 715-605-150 RRID: AB_2340862 |
| Alexa Fluor 647-conjugated anti-mouse BCL-2 (BCL/10C4)        | BioLegend                 | catalog no. 633510 RRID:AB_2274702       |
| Biotinylated anti-mouse CD8a (5.3-6.7)                        | BioLegend                 | catalog no. 100704 RRID: AB_312743       |
| Biotinylated anti-mouse CD11c (N418)                          | BioLegend                 | catalog no. 117304 RRID: AB_313773       |

|                                                   |                        |                                         |
|---------------------------------------------------|------------------------|-----------------------------------------|
| Biotinylated anti-mouse CD11b (M1/70)             | BioLegend              | catalog no. 101204 RRID: AB 312787      |
| Biotinylated anti-mouse NK1.1 (PK136)             | BioLegend              | catalog no. 108704 RRID: AB 313391      |
| Biotinylated anti-mouse Ter119 (TER-119)          | BioLegend              | catalog no. 116204 RRID:AB 313705       |
| Biotinylated anti-mouse CD19 (6D5)                | BioLegend              | catalog no. 115504 RRID:AB 313639       |
| Biotinylated anti-mouse B220 (RA3-6B2)            | BioLegend              | catalog no. 103204 RRID:AB 312989       |
| Biotinylated anti-mouse CD25 (PC61)               | BioLegend              | catalog no. 102004 RRID:AB 312853       |
| Biotinylated anti-mouse TCR $\gamma/\delta$ (GL3) | BioLegend              | catalog no. 118103 RRID:AB 313827       |
| Biotinylated anti-mouse CD44 (IM7)                | BioLegend              | catalog no. 103003 RRID:AB 312954       |
| InVivoMab anti-mouse CD3 $\epsilon$ (145-2C11)    | Bio X Cell             | catalog no. BE0001-1<br>RRID:AB 1107634 |
| InVivoMab anti-mouse CD28 (37.51)                 | Bio X Cell             | catalog no. BE0015-1<br>RRID:AB 1107628 |
| InVivoMab rat IgG2A isotype control (2A3)         | Bio X Cell             | catalog no. BE0089 RRID:AB 1107769      |
| InVivoMab anti-mouse CD127 (A7R34)                | Bio X Cell             | catalog no. BE0065 RRID:AB 1107590      |
| Chemicals, Peptides, and Recombinant Proteins     |                        |                                         |
| PBS                                               | Gibco                  | catalog no. 14190250                    |
| RPMI-1640                                         | Gibco                  | catalog no. 11875119                    |
| DMEM                                              | Corning                | catalog no. 10014CV                     |
| OptiMEM                                           | Gibco                  | catalog no. 51985034                    |
| Tamoxifen                                         | Sigma-Aldrich          | catalog no. T5648                       |
| ABT-199                                           | Tocris                 | catalog no. 6960                        |
| SP600125                                          | Selleckchem            | catalog no. S1460                       |
| H-89                                              | Selleckchem            | catalog no. S1582                       |
| JNK-IN-8                                          | MedChemExpress         | catalog no. HY-13319                    |
| Dexamethasone                                     | Sigma-Aldrich          | catalog no. D1756                       |
| SEW-2871                                          | Cayman Chemical        | catalog no. 10006440                    |
| Fingolimod                                        | Cayman Chemical        | catalog no. 10006292                    |
| 4-deoxypyridoxine-HCl                             | Sigma-Aldrich          | catalog no. D0501                       |
| Lipofectamine 2000                                | Thermo Fisher          | catalog no. 11668027                    |
| Polybrene                                         | Sigma-Aldrich          | catalog no. TR-1003                     |
| Lymphoprep                                        | Stem Cell Technologies | catalog no. 7801                        |
| Recombinant murine IL-7                           | Peprtech               | catalog no. 217-17                      |

|                                                                                    |                            |                              |
|------------------------------------------------------------------------------------|----------------------------|------------------------------|
| Recombinant human IL-2                                                             | Peprotech                  | catalog no. 200-02           |
| Recombinant murine IL-15                                                           | Peprotech                  | catalog no. 210-15           |
| Fas ligand                                                                         | Enzo Life Sciences         | catalog no. ALX-850-014-KI02 |
| TRIzol LS                                                                          | Thermo Fisher Scientific   | catalog no. 10296010         |
| Linear Acrylamide                                                                  | Thermo Fisher Scientific   | catalog no. am9520           |
| Magnisort Negative Selection Beads                                                 | Thermo Fisher Scientific   | catalog no. MSNB-6002-71     |
| FITC-conjugated caspACE-VAD-FMK                                                    | Promega                    | catalog no. G7461            |
| Pacific Blue-conjugated AnnexinV                                                   | BioLegend                  | catalog no. 640918           |
| APC-conjugated AnnexinV                                                            | BioLegend                  | catalog no. 640920           |
| AnnexinV Binding Buffer                                                            | BioLegend                  | catalog no. 422201           |
| Corn Oil                                                                           | Sigma-Aldrich              | catalog no. C8267            |
| Sucrose                                                                            | Sigma-Aldrich              | catalog no. S9378            |
| Tween 20                                                                           | Sigma-Aldrich              | catalog no. P1379            |
| Tween 80                                                                           | Sigma-Aldrich              | catalog no. P1754            |
| PEG400                                                                             | Sigma-Aldrich              | catalog no. PX1286B-2        |
| Critical Commercial Assays                                                         |                            |                              |
| Rneasy Plus Micro Kits                                                             | QIAGEN                     | catalog no. 74034            |
| Rnase-free Dnase set                                                               | QIAGEN                     | catalog no. 79254            |
| eBioscience FoxP3 staining kit                                                     | Thermo Fisher Scientific   | catalog no. 00-5523-00       |
| Cytofix/Cytoperm Kit                                                               | BD Biosciences             | catalog no. 554714           |
| CellTrace Yellow Cell Proliferation Kit for Flow Cytometry                         | Thermo Fisher Scientific   | catalog no. C34567           |
| CellTrace Violet Cell Proliferation Kit for Flow Cytometry                         | Thermo Fisher Scientific   | catalog no. C34557           |
| Live/DEAD Fixable Blue Dead Cell Stain Kit                                         | Thermo Fisher Scientific   | catalog no. L23105           |
| Experimental Models: Cells/ Cell Lines                                             |                            |                              |
| <i>Grk2<sup>fl</sup>-Cd4-Cre</i> and <i>Grk2<sup>fl+</sup> Cd4-Cre</i> bone marrow | Laboratory of Jason Cyster | Arnon et al., 2011           |
| Platinum-E (plat-E) cell line                                                      | Laboratory of T Kitamura   | Morita et al., 2000          |
| Sheep Red Blood Cells                                                              | Colorado Serum Company     | catalog no. 31112            |
| Experimental Models: Organisms/ Strains                                            |                            |                              |
| C57BL/6J                                                                           | Jackson Laboratory         | RRID: IMSR_JAX:000664        |
| B6.SJL- <i>Ptprc<sup>a</sup>Pepc<sup>b</sup></i> /BoyJ                             | Jackson Laboratory         | RRID: IMSR_JAX:002014        |
| <i>Spns2<sup>fl</sup></i>                                                          | This laboratory            | Mendoza et al., 2012         |
| <i>Slpr1<sup>fl</sup></i>                                                          | Jackson laboratory         | RRID: IMSR_JAX:019141        |
| UBC-CreERT2                                                                        | Jackson laboratory         | RRID: IMSR_JAX:007001        |
| <i>Lyve1-Cre</i>                                                                   | Laboratory of Jason Cyster | Pham et al., 2010            |
| <i>Bax<sup>-/-</sup></i>                                                           | Jackson Laboratory         | RRID: IMSR_JAX:002994        |

|                                     |                                 |                                                                                                                                                                                                                                                                                       |
|-------------------------------------|---------------------------------|---------------------------------------------------------------------------------------------------------------------------------------------------------------------------------------------------------------------------------------------------------------------------------------|
| MHCII <sup>-/-</sup>                | Jackson Laboratory              | RRID: IMSR_JAX:003584                                                                                                                                                                                                                                                                 |
| <i>Cd69</i> <sup>-/-</sup>          | Laboratory of Jason Cyster      | Murata et al., 2003                                                                                                                                                                                                                                                                   |
| <i>Sphk1</i> <sup>fl/fl</sup>       | Laboratory of Jason Cyster      | Pappu et al., 2007                                                                                                                                                                                                                                                                    |
| <i>Sphk2</i> <sup>-/-</sup>         | Jackson Laboratory              | RRID: IMSR_JAX:019140                                                                                                                                                                                                                                                                 |
| OT-I: C57BL/6-Tg(TcrαTcrβ)1100Mjb/J | Jackson Laboratory              | IMSR_JAX:003831                                                                                                                                                                                                                                                                       |
| OT-II: B6.Cg-Tg(TcrαTcrβ)425Cbn/J   | Jackson Laboratory              | IMSR_JAX:004194                                                                                                                                                                                                                                                                       |
| Recombinant DNA                     |                                 |                                                                                                                                                                                                                                                                                       |
| pMIGR1                              | Addgene (gift from Warren Pear) | RRID: Addgene_27490                                                                                                                                                                                                                                                                   |
| WT S1PR1-pMIGR1                     | This laboratory                 |                                                                                                                                                                                                                                                                                       |
| ST10A S1PR1-pMIGR1                  | This laboratory                 |                                                                                                                                                                                                                                                                                       |
| Software and algorithms             |                                 |                                                                                                                                                                                                                                                                                       |
| GraphPad Prism 9.0                  | GraphPad                        | <a href="https://www.graphpad.com/scientific-software/prism/">https://www.graphpad.com/scientific-software/prism/</a>                                                                                                                                                                 |
| FlowJo v 10                         | TreeStar                        | <a href="https://www.flowjo.com/solutions/flowjo">https://www.flowjo.com/solutions/flowjo</a>                                                                                                                                                                                         |
| FACSDiva v8.02                      | BD Biosciences                  | <a href="https://www.bdbiosciences.com/en-us/instruments/research-instruments/research-software/flow-cytometry-acquisition/facsdiva-software">https://www.bdbiosciences.com/en-us/instruments/research-instruments/research-software/flow-cytometry-acquisition/facsdiva-software</a> |
| Biorender                           | Biorender                       | <a href="http://www.biorender.com">www.biorender.com</a>                                                                                                                                                                                                                              |
| ImageJ v 1.49                       | NIH                             | <a href="https://imagej.nih.gov/ezproxy.med.nyu.edu/ij/">https://imagej.nih.gov/ezproxy.med.nyu.edu/ij/</a>                                                                                                                                                                           |
| Other                               |                                 |                                                                                                                                                                                                                                                                                       |
| LSRII Flow Cytometer                | BD Biosciences                  | N/A                                                                                                                                                                                                                                                                                   |
| Beckman Coulter Multisizer 3        | Beckman Coulter                 | catalog no. 383601                                                                                                                                                                                                                                                                    |
| LightCycler 480 System              | Roche Diagnostics               | catalog no. 5015243001                                                                                                                                                                                                                                                                |
